# Supplementary material
Source: Royal Society of Chemistry journal article supplement (doi:10.1039/d6ay00494f)
Supplement: d6ay00494f1.pdf [file d6ay00494f1.pdf]

## Supporting information

### **Zirconium and vanadium bimetallic organic framework nanozyme for bioenzymes-free colorimetric and photothermal dual-mode direct detection of organophosphorus pesticides**

Chenxu Wang,<sup>#</sup> Ningjing Du,<sup>#</sup> Zhe You, Yinhui Yi, Gangbing Zhu\*

School of the Environment and Safety Engineering, Key Laboratory of Zhenjiang, and Collaborative Innovation Center of Technology and Material of Water Treatment, Jiangsu University, Zhenjiang, 212013, P. R. China

---

<sup>#</sup> Co-first authors.

\*Corresponding author. E-mail address: zhgb1030@ujs.edu.cn.

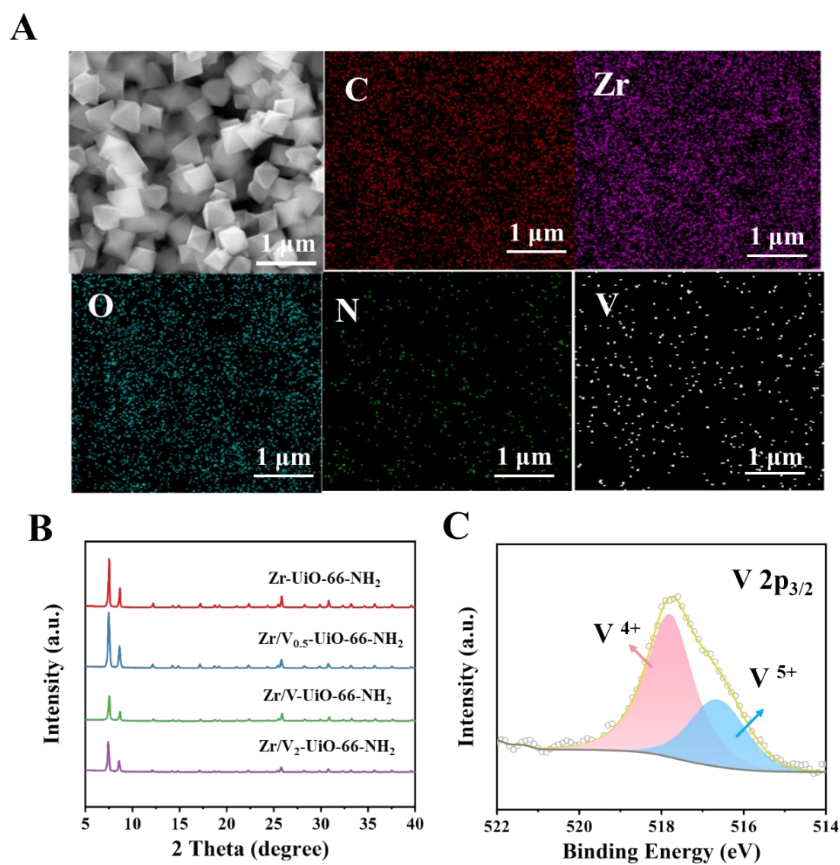

**Figure S1.** (A) The SEM image of Zr/V-UiO-66-NH<sub>2</sub> MOFs and the related EDS mapping; (B) the XRD patterns of Zr/V<sub>x</sub>-UiO-66-NH<sub>2</sub> MOFs at different Zr/ V ratios. (C) High-resolution XPS of V 2p<sub>3/2</sub>.

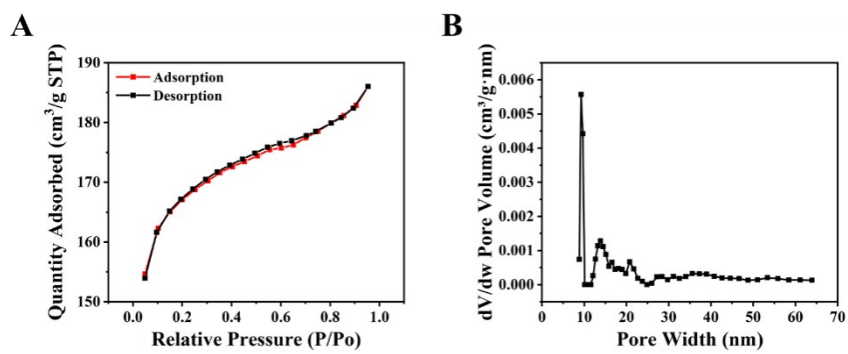

**Figure S2.** (A) The N<sub>2</sub> adsorption-desorption isotherm and (B) the pore size distribution of Zr/V-UiO-66-NH<sub>2</sub>.

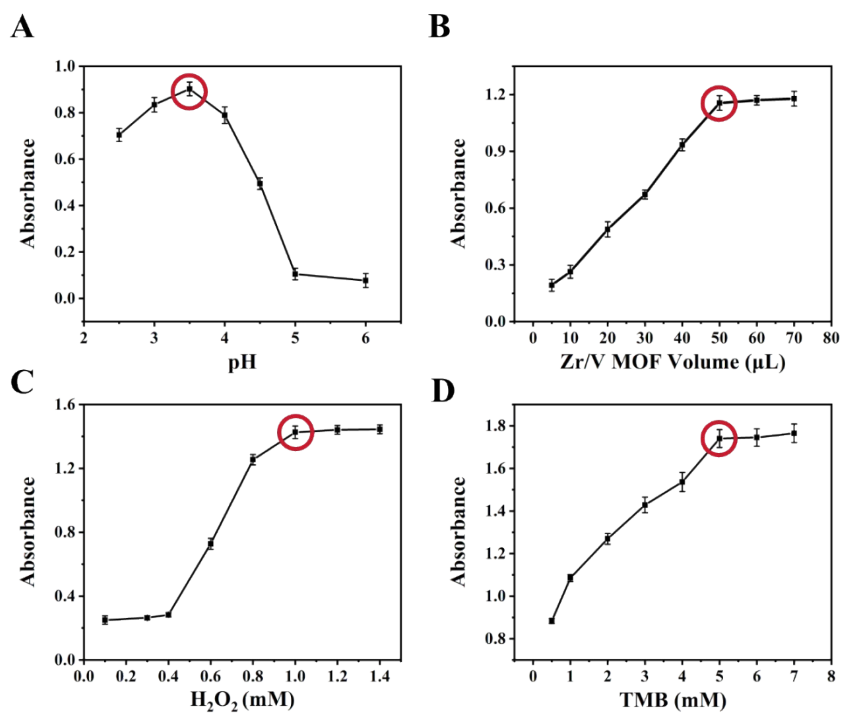

**Figure S3.** The effect of the (A) pH value, (B) Zr/V-UiO-66-NH<sub>2</sub>'s volume, (C) H<sub>2</sub>O<sub>2</sub> concentration and (D) TMB concentration.

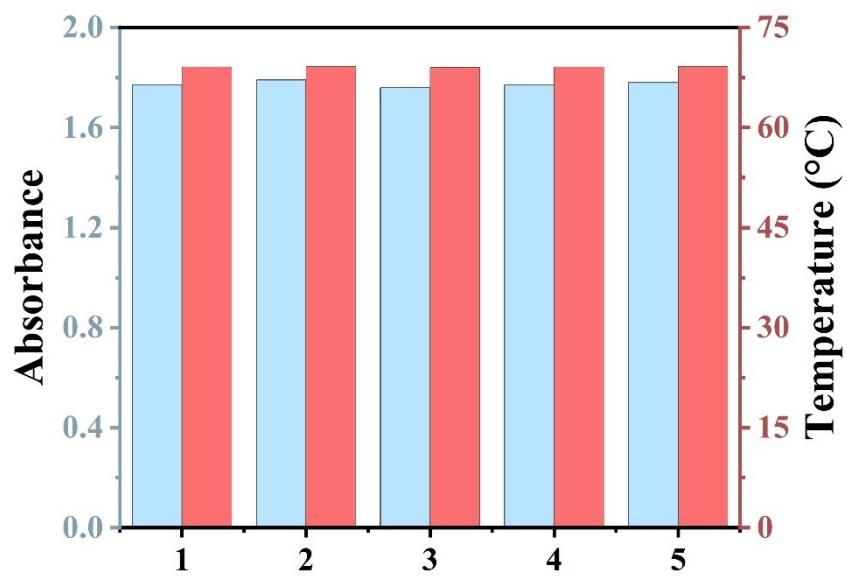

**Figure S4.** Colorimetric/photothermal signal stability of Zr/V-UiO-66-NH<sub>2</sub> in different batches.

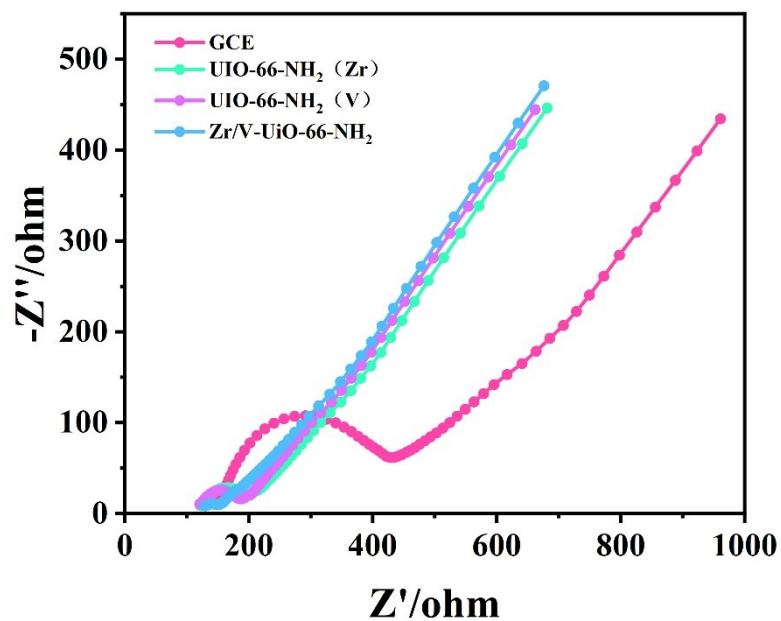

**Figure S5.** Electrochemical impedance spectroscopy of GCE, UIO-66-NH<sub>2</sub> (Zr), UIO-66-NH<sub>2</sub> (V) and Zr/V-UiO-66-NH<sub>2</sub>.

**Table S1.** Comparison of  $K_m$  and  $V_{max}$  of Zr/V-UiO-66-NH<sub>2</sub> with other enzymes.

| Enzymes                                            | Substrate                     | $K_m$ (mM) | $V_{max}$ ( $10^{-8}$ Ms <sup>-1</sup> ) | Ref.      |
|----------------------------------------------------|-------------------------------|------------|------------------------------------------|-----------|
| MoSA-N3-C                                          | TMB                           | 0.79       | 11.2                                     | 1         |
|                                                    | H <sub>2</sub> O <sub>2</sub> | 2          | 37.0                                     |           |
| Zr <sub>3</sub> Fe <sub>3</sub> O <sub>4</sub> NPs | TMB                           | 0.62       | 66.7                                     | 2         |
|                                                    | H <sub>2</sub> O <sub>2</sub> | 45.99      | 5.56                                     |           |
| Zr-MOFs@Pt                                         | TMB                           | 0.34       | 9.98                                     | 3         |
|                                                    | H <sub>2</sub> O <sub>2</sub> | 1.52       | 7.09                                     |           |
| V2O5-(Ce <sup>3+</sup> /Ce <sup>4+</sup> )-MOF     | TMB                           | 0.35       | 5.33                                     | 4         |
|                                                    | H <sub>2</sub> O <sub>2</sub> | -          | -                                        |           |
| MIL-88B(V)                                         | TMB                           | 1.49       | 9.32                                     | 5         |
|                                                    | H <sub>2</sub> O <sub>2</sub> | 3.22       | 9.62                                     |           |
| UiO-66-TCPP                                        | TMB                           | 1.66       | 4.47                                     | 6         |
|                                                    | H <sub>2</sub> O <sub>2</sub> | 0.42       | 1.26                                     |           |
| Zr/V-UiO-66-NH <sub>2</sub>                        | TMB                           | 0.79       | 61.0                                     | This work |
|                                                    | H <sub>2</sub> O <sub>2</sub> | 0.92       | 66.4                                     |           |

**Table S2.** Comparison of different methods for OPs detection.

| Sensor                                                        | Method       | Bioenzymes | Linearity (ng mL <sup>-1</sup> ) | Detection limit (ng mL <sup>-1</sup> ) | Ref.      |
|---------------------------------------------------------------|--------------|------------|----------------------------------|----------------------------------------|-----------|
| FeSA/FeNP                                                     | LSV          | AChE       | 0.5-200                          | 0.24                                   | 7         |
| Cu/Ce-MOF-808                                                 | Colorimetry  | AChE       | 900-4×10 <sup>5</sup>            | 420                                    | 8         |
| TPE-Fc/GSH-AuNC                                               | Fluorescent  | AChE       | 10-2000                          | 2.05                                   | 9         |
| MnO <sub>2</sub> NSs                                          | Photothermal | AChE       | 0.1-8000                         | 1.01                                   | 10        |
| Pt-Ni NPs                                                     | Colorimetry  | AChE       | 5-200                            | 1.2                                    | 11        |
| MnO <sub>2</sub> NSs/TH-[Ru(bpy) <sub>3</sub> ] <sup>2+</sup> | Fluorescent  | AChE       | 0.1-8×10 <sup>3</sup>            | 1.13×10 <sup>-3</sup>                  | 12        |
| PCN-224-Mn                                                    | Photothermal | ACP        | 10-10 <sup>4</sup>               | 1.01                                   | 13        |
|                                                               | Colorimetry  | ACP        | 5-10000                          | 1.47                                   |           |
| Zr/V-UiO-66-NH <sub>2</sub>                                   | Colorimetry  | Free       | 0.05-1500                        | 0.016                                  | This work |
|                                                               | Photothermal |            | 0.4-5000                         | 0.13                                   |           |

## References

- 1 Y. Wang, G. Jia, X. Cui, X. Zhao, Q. Zhang, L. Gu, L. Zheng, L.H. Li, Q. Wu, D.J. Singh, D. Matsumura, T. Tsuji, Y.-T. Cui, J. Zhao, and W. Zheng, *Chem*, 2021, **7**, 436-449.
- 2 P. Hu, M. Li, S. Li, and S. Wang, *Talanta*, 2025, **287**, 127629.
- 3 N. Wang, Z. Li, X. Wu, Y. Zhao, and X. Su, *Microchemical Journal*, 2024, **203**, 110954.
- 4 S. Vaziri Nasab, H. Ashrafi, and M. Akhond, *ACS Applied Nano Materials*, 2023, **6**, 11990-12001.
- 5 N. Du, W. Weng, Y. Xu, Y. Zhou, Y. Yi, Y. Zhao, and G. Zhu, *Inorganic Chemistry*, 2024, **63**, 16442-16450.
- 6 C. Zhang, Y. Wang, Q. Zhang, B. Liu, and X. Yang, *Food Chemistry*, 2025, **495**, 146330.
- 7 P. Zong, L. Jiao, R. Li, X. Jia, X. Li, L. Hu, C. Chen, D. Yan, Y. Zhai, and X. Lu, *Analytical Chemistry*, 2024, **96**, 10021-10027.
- 8 Y. Qin, H. Liang, J. Wu, Z. Chi, S. Zhao, and F. Ye, *Analytical chemistry*, 2025, **97**, 8468-8475.
- 9 X. Wang, H. Yu, Q. Li, Y. Tian, X. Gao, W. Zhang, Z. Sun, Y. Mou, X. Sun, and Y. Guo, *Food Chemistry*, 2024, **431**, 137067.
- 10 W. Jiang, Z. Yang, F. Tong, S. Zhang, L. Zhu, L. Wang, L. Huang, K. Liu, M. Zheng, Y. Zhou,

- R. Hou, and Y. Liu, *Biosensors and Bioelectronics*, 2023, **224**, 115074.
- 11 W. Jiang, Y. Feng, C. Jiang, H. Li, Z. Wang, Y. Xiao, W. Lan, and Y. Liu, *Sensors and Actuators B: Chemical*, 2024, **412**, 135861.
- 12 X. Liu, Z. Wu, X. Yang, Q. Wang, L. Zou, W. Mei, Y. Zheng, and K. Wang, *Microchimica Acta*, 2020, **187**, 652.
- 13 Z. Wang, H. Li, C. Jiang, W. Liu, S. Zhang, Y. Zhou, K. Liu, Y. Xiao, R. Hou, X. Wan, and Y. Liu, *Journal of Colloid and Interface Science*, 2024, **661**, 1060-1069.
